# Supplementary material for: Photothermal conversion upon near-infrared irradiation of fluorescent carbon nanoparticles formed from carbonized polydopamine
Source: Royal Society of Chemistry journal article supplement (doi:10.1039/c6ra08196g), 2016-01-01
Supplement: c6ra08196g1.pdf [file c6ra08196g1.pdf]

## Electronic Supplementary Information (ESI)

# **Photothermal conversion upon near-infrared irradiation of fluorescent carbon nanoparticles formed from carbonized polydopamine**

Sung Han Kim, <sup>a</sup> Shazid Md. Sharker, <sup>b</sup> Haeshin Lee, <sup>b</sup> Insik In, <sup>\*a,c</sup> Kang Dae Lee <sup>\*d</sup> and Sung Young Park <sup>\*a,e</sup>

<sup>a</sup> Department of IT Convergence, Korea National University of Transportation, Chungju 380-702, Republic of Korea

<sup>b</sup> Department of Chemistry, Korea Advanced Institute of Science and Technology (KAIST), Daejeon 305-701, Republic of Korea

<sup>c</sup> Department of Polymer Science and Engineering, Korea National University of Transportation, Chungju 380-702, Republic of Korea, E-mail: in1@ut.ac.kr

<sup>d</sup> Department of Otolaryngology-Head and Neck Surgery, College of Medicine Kosin University, Busan, 602-702, Republic of Korea, E-mail: kdlee@ns.kosinmed.or.kr

<sup>e</sup> Department of Chemical and Biological Engineering, Korea National University of Transportation, Chungju 380-702, Republic of Korea, E-mail: parkchem@ut.ac.kr

### Author Contributions

Sung Han Kim and Shazid Md. Sharker contributed equally to this work.

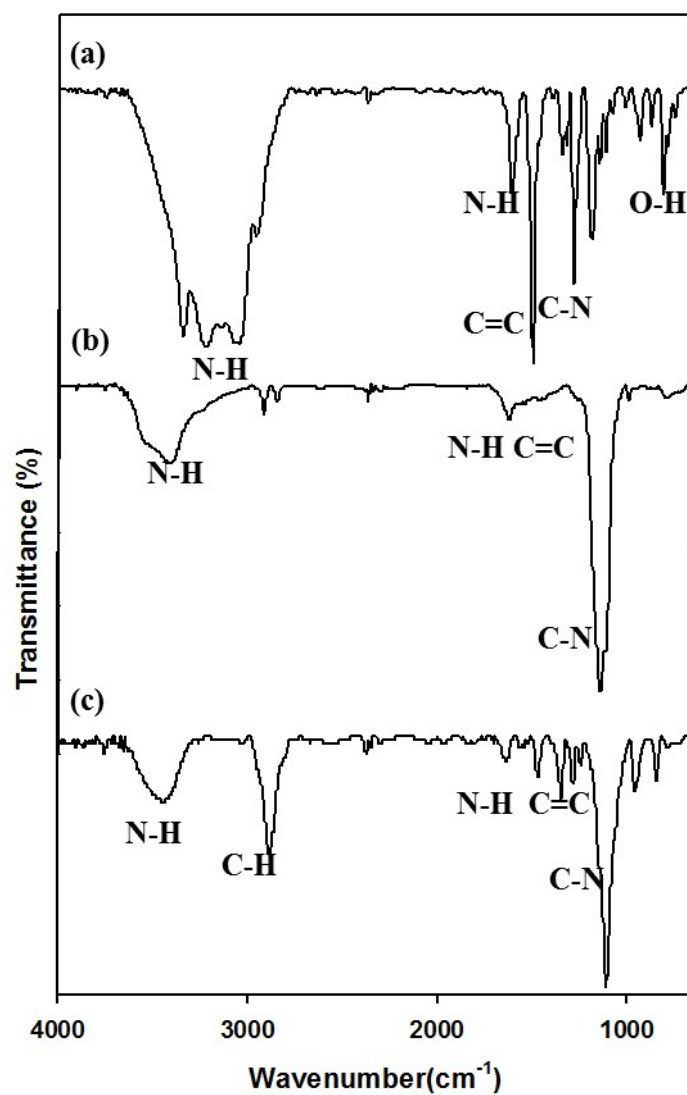

**Fig. S1** FT-IR characterization of (a) polydopamine (pDA), (b) FNP-pDA and (c) surface passivated FNP-pDA.

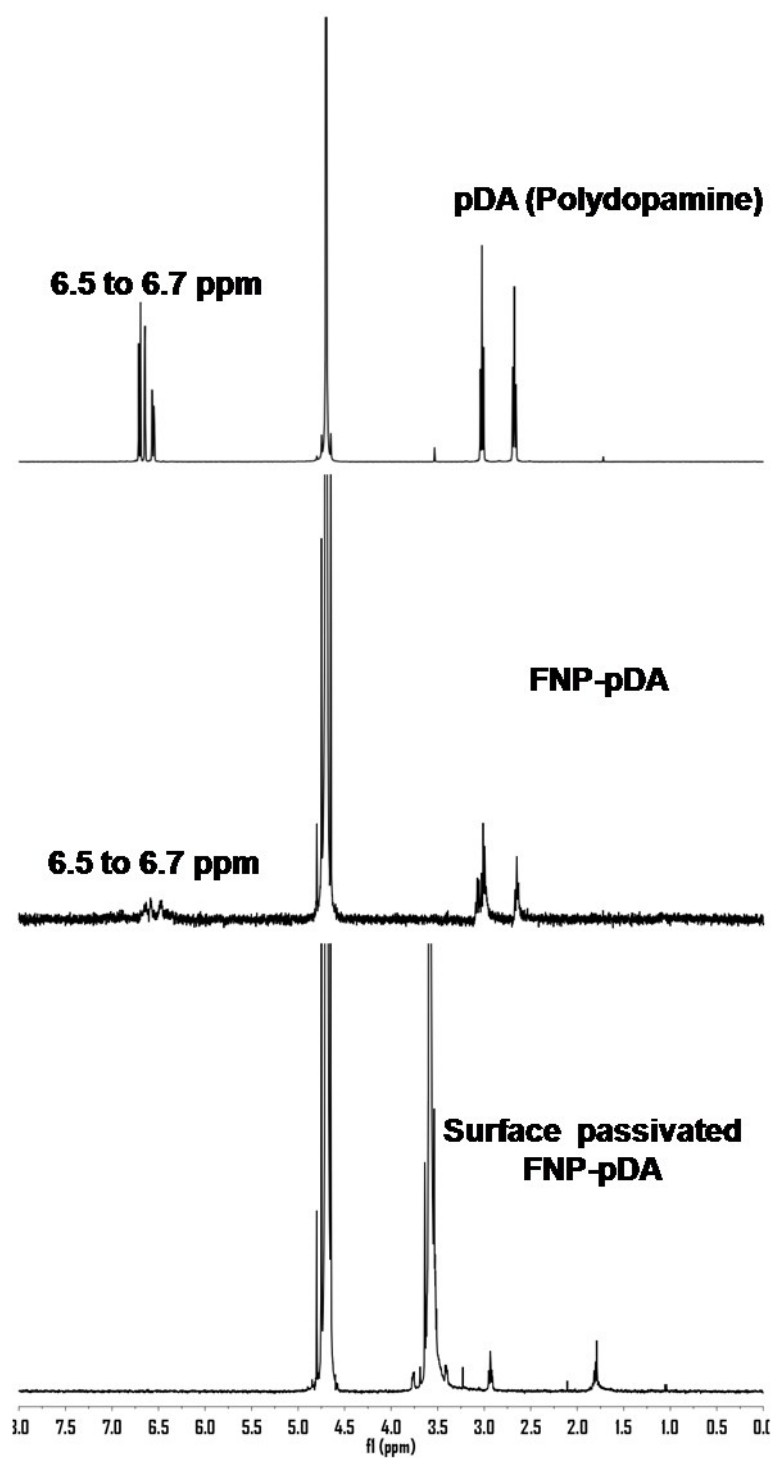

**Fig. S2**  $^1\text{H}$  NMR (400, MHz,  $\text{D}_2\text{O}$ ) spectroscopic analysis of polydopamine (pDA), FNP-pDA and surface passivated FNP-pDA.

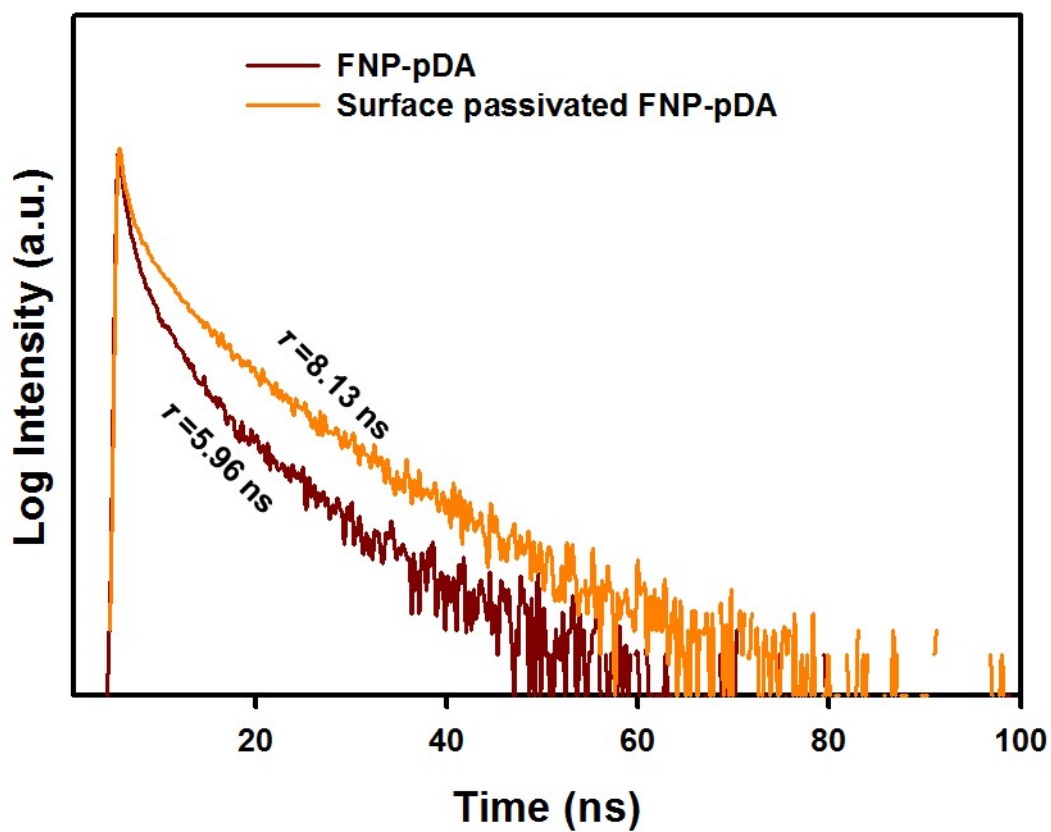

**Fig. S3** Fluorescence life time curve of FNP-pDA and surface passivated FNP-pDA in 375 nm wavelength. The  $\tau$  value indicates respective fluorescence lifetime.

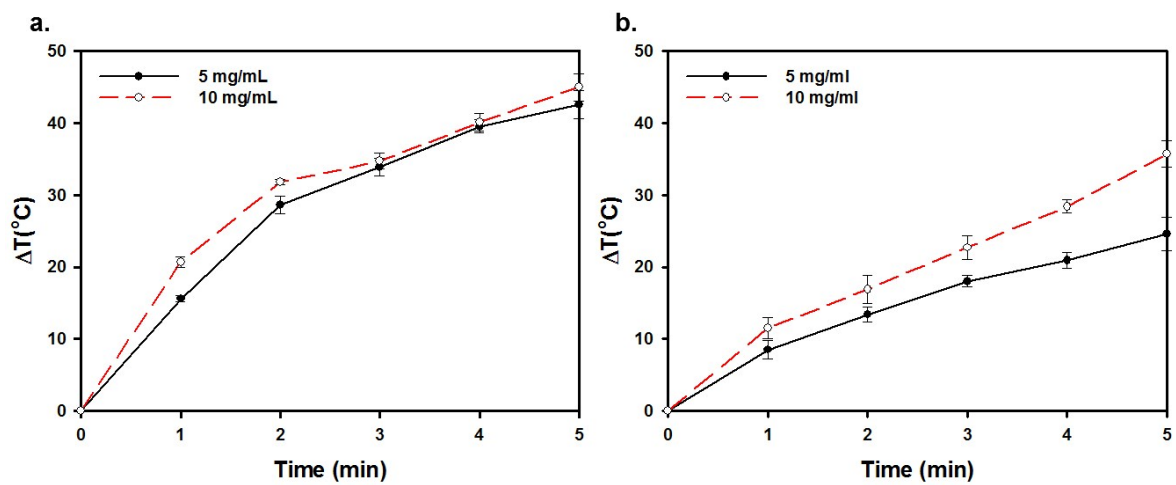

**Fig. S4** The concentration dependent (5 and 10 mg/mL) photothermal conversion of (a) FNP-pDA and (b) surface passivated FNP-pDA in response to NIR light irradiation. The NIR laser was 808 nm and  $2\text{W}/\text{cm}^2$  power intensity.

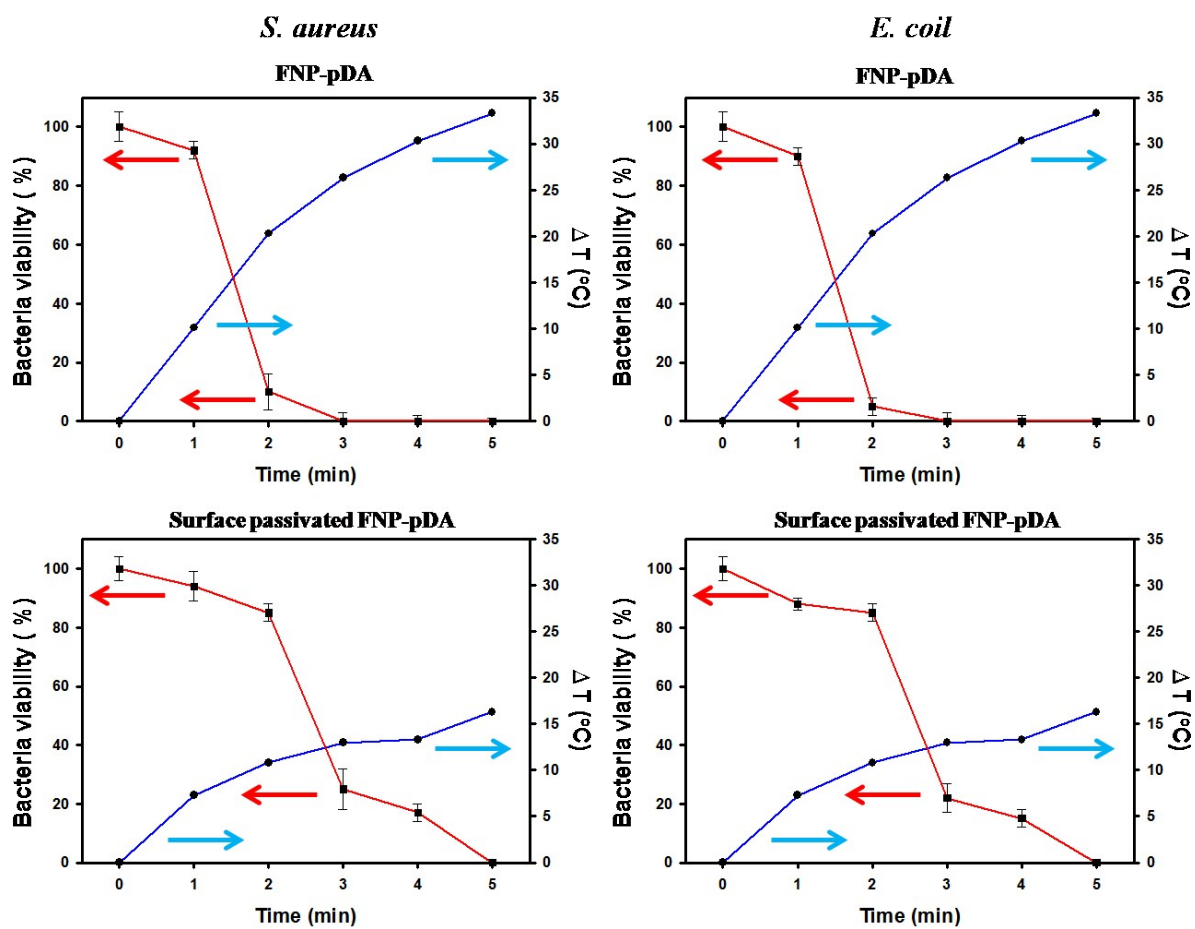

**Fig. S5** The temperature and time (NIR irradiation) dependent the percentage of bacterial viability treated of (a, b) FNP-pDA and (c, d) surface passivated FNP-pDA incubate with *S. aureus* and *E. coli* bacteria, respectively.

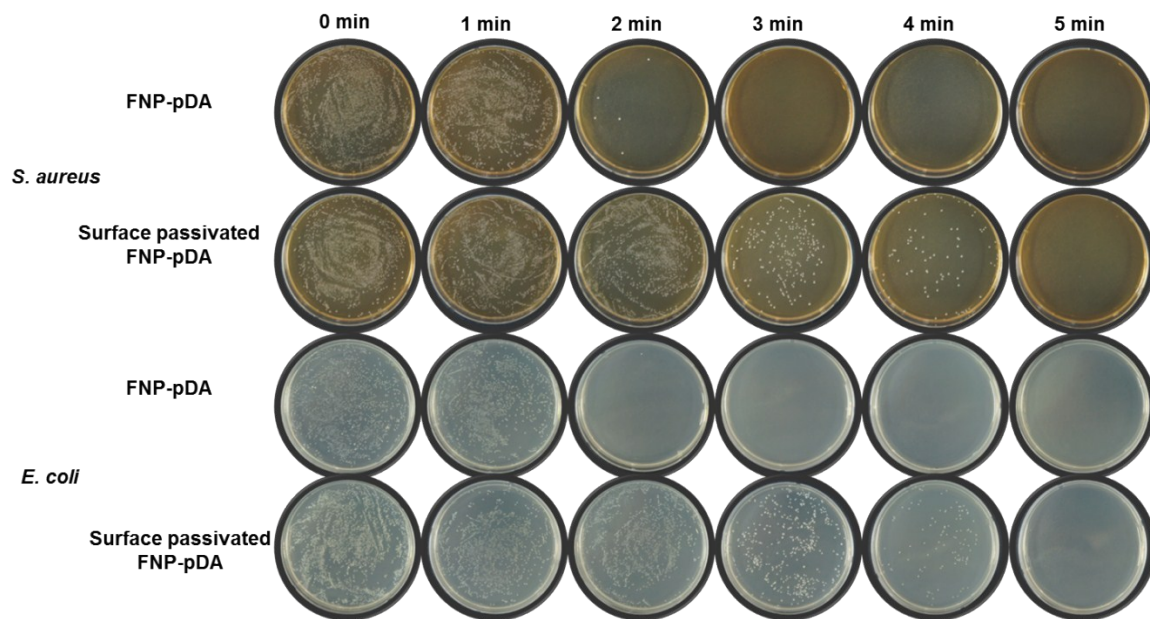

**Fig. S6** The time (NIR irradiation) dependent the bacterial zone of inhibition (number) treated with FNP-pDA and surface passivated FNP-pDA in *S. aureus* and *E. coli* bacteria, respectively.
